# Supplementary material for: Micro-RNA-155 is induced by K-Ras oncogenic signal and promotes ROS stress in pancreatic cancer
Source: PubMed Central journal article supplement (PMC4673256; doi:10.18632/oncotarget.4125), 2015-05-12
Supplement: oncotarget-06-21148-s001.pdf [file oncotarget-06-21148-s001.pdf]

## Micro-RNA-155 is induced by K-Ras oncogenic signal and promotes ROS stress in pancreatic cancer

Supplementary Material

Figure S1

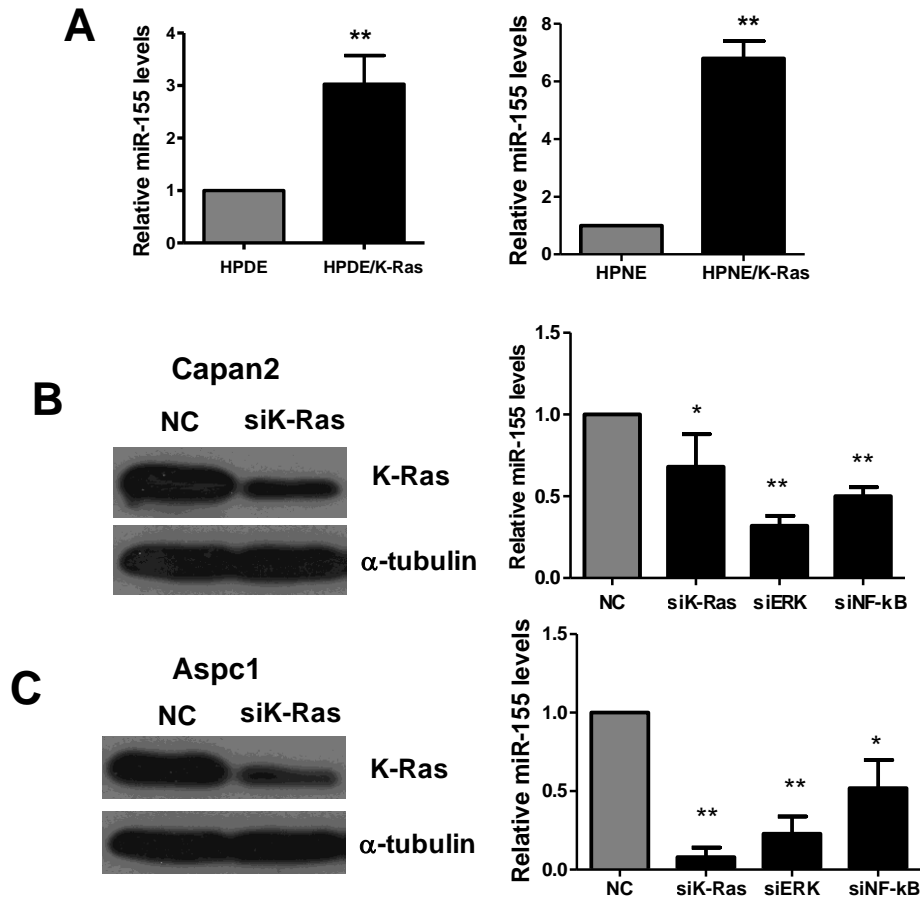

**Figure S1.** (A) qRT-PCR data showing substantial increase of miR-155 expression in K-ras transformed pancreatic ductal epithelial cells (HPDE/K-ras, HPNE/K-Ras) compared with the parental cells (HPDE, HPNE). Data are shown as mean  $\pm$  SD,  $**p < 0.01$ ,  $n = 3$ . (B-C) Inhibition of K-Ras, ERK and NF- $\kappa$ B significantly inhibited miR-155 expressions in Capan-2 and Aspc-1 cells.

Figure S2

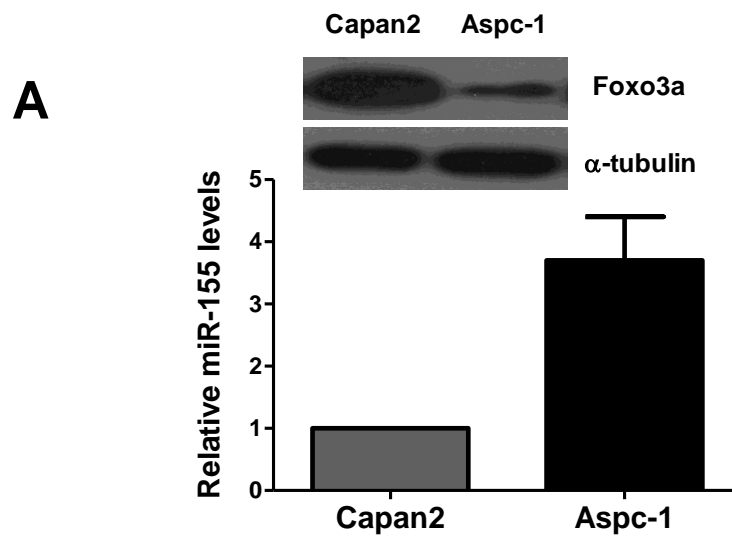

**B**

|                                    | predicted consequential pairing of target region (top) and miRNA (bottom) |
|------------------------------------|---------------------------------------------------------------------------|
| Position 1497-1503 of FOXO3 3' UTR | 5' ...UUUCUUUGCAUAAAAAGCAUUAG...                                          |
| hsa-miR-155                        | 3' UGGGGAUAGUGCUAAUCGUAUU                                                 |

**Figure S2.** (A) Inverse correlation between miR-155 and Foxo3 expression in pancreatic cancer cells Capan-2 and Aspc-1. (B) TargetScan database was used to predict the binding region of miR-155 in Foxo3 3'-UTR site.
